# Supplementary material
Source: PubMed Central journal article supplement (PMC8385563)

**Disclosure Purpose:** 21-11462

### Summary of Interests

I do not have any interests to disclose at this time.

### Additional Questions:

- Are there other relationships or activities that readers could perceive to have influenced, or that give the appearance of potentially influencing, what you wrote in the submitted work?**  
No.
- What is the manuscript title?**  
A Randomized Trial of Third Dose mRNA-1273 Vaccine in Transplant Recipients
- Are you the corresponding author?**  
No.

### Certification

I certify that the information provided in this disclosure is complete and accurate.

**Disclosure Purpose:** 21-11462

Summary of Interests

I do not have any interests to disclose at this time.

Additional Questions:

- 1. **Are there other relationships or activities that readers could perceive to have influenced, or that give the appearance of potentially influencing, what you wrote in the submitted work?**  
No.
- 2. **What is the manuscript title?**  
A Randomized Trial of Third Dose mRNA-1273 Vaccine in Transplant Recipients
- 3. **Are you the corresponding author?**  
No.

Certification

I certify that the information provided in this disclosure is complete and accurate.

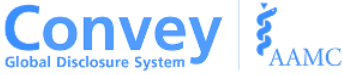

**Disclosure Purpose:** 21-11462

### Summary of Interests

I do not have any interests to disclose at this time.

### Additional Questions:

- Are there other relationships or activities that readers could perceive to have influenced, or that give the appearance of potentially influencing, what you wrote in the submitted work?**  
No.
- What is the manuscript title?**  
A Randomized Trial of Third Dose mRNA-1273 Vaccine in Transplant Recipients
- Are you the corresponding author?**  
No.

### Certification

I certify that the information provided in this disclosure is complete and accurate.

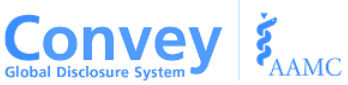

Disclosure Purpose: 21-11462

## Summary of Interests

### Company or Organization

| Entity                                                                                                                                                  | Type             | Interest Held By                                                                |
|---------------------------------------------------------------------------------------------------------------------------------------------------------|------------------|---------------------------------------------------------------------------------|
| <a href="#">Astellas Pharma</a>                                                                                                                         | Grant / Contract | Self                                                                            |
| <i>Recipient Name:</i> Atul<br><i>Grant / Contract Description:</i> Research support and Education support<br><i>Additional Information:</i>            |                  | <i>Recipient Type:</i> Institution<br><i>Grant / Contract Purpose:</i> Research |
| <a href="#">Astellas Pharma</a>                                                                                                                         | Consultant       | Self                                                                            |
| <i>Category:</i> Consultant<br><i>Additional Information:</i>                                                                                           |                  | <i>Description:</i> Advisory                                                    |
| <a href="#">F. Hoffmann-La Roche</a>                                                                                                                    | Grant / Contract | Self                                                                            |
| <i>Recipient Name:</i> Atul Humar, University Health Network<br><i>Grant / Contract Description:</i> Research Support<br><i>Additional Information:</i> |                  | <i>Recipient Type:</i> Institution<br><i>Grant / Contract Purpose:</i> Research |
| <a href="#">Merck</a>                                                                                                                                   | Grant / Contract | Self                                                                            |
| <i>Recipient Name:</i> Atul Humar<br><i>Grant / Contract Description:</i> Clinical trial for CMV prevention<br><i>Additional Information:</i>           |                  | <i>Recipient Type:</i> Institution<br><i>Grant / Contract Purpose:</i> Research |
| <a href="#">Merck</a>                                                                                                                                   | Consultant       | Self                                                                            |
| <i>Category:</i> Consultant<br><i>Additional Information:</i>                                                                                           |                  | <i>Description:</i> Advisory Board                                              |

### Additional Questions:

- Are there other relationships or activities that readers could perceive to have influenced, or that give the appearance of potentially influencing, what you wrote in the submitted work?**

No.
- What is the manuscript title?**

A Randomized Trial of Third Dose mRNA-1273 Vaccine in Transplant Recipients
- Are you the corresponding author?**

Yes.

  - Please list the other authors' names here.**

Victoria G. Hall, M.B.B.S. Victor H. Ferreira, Ph.D. Terrance Ku, M.Sc. Matthew Ierullo, M.Sc. Beata Majchrzak-Kita, M.Sc. Cecilia Chaparro, M.D. Nazia Selzner, M.D. Jeffrey Schiff, M.D. Michael McDonald, M.D. George Tomlinson, Ph.D. Vathany Kulasingam, Ph.D. Deepali Kumar, M.D.

### Certification

I certify that the information provided in this disclosure is complete and accurate.

**Disclosure Purpose:** 21-11462

**Summary of Interests**

I do not have any interests to disclose at this time.

**Additional Questions:**

- 1. **Are there other relationships or activities that readers could perceive to have influenced, or that give the appearance of potentially influencing, what you wrote in the submitted work?**  
No.
- 2. **What is the manuscript title?**  
A Randomized Trial of Third Dose mRNA-1273 Vaccine in Transplant Recipients
- 3. **Are you the corresponding author?**  
No.

**Certification**

I certify that the information provided in this disclosure is complete and accurate.

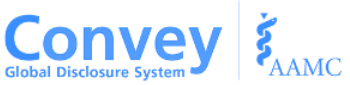

**Disclosure Purpose:** 21-11462

**Summary of Interests**

I do not have any interests to disclose at this time.

**Additional Questions:**

- 1. **Are there other relationships or activities that readers could perceive to have influenced, or that give the appearance of potentially influencing, what you wrote in the submitted work?**  
No.
- 2. **What is the manuscript title?**  
A Randomized Trial of Third Dose mRNA-1273 Vaccine in Transplant Recipients
- 3. **Are you the corresponding author?**  
No.

**Certification**

I certify that the information provided in this disclosure is complete and accurate.

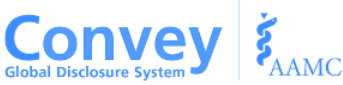

**Disclosure Purpose:** 21-11462

## Summary of Interests

| Company or Organization                                       |            |                                                                          |
|---------------------------------------------------------------|------------|--------------------------------------------------------------------------|
| Entity                                                        | Type       | Interest Held By                                                         |
| <a href="#">Abbott Laboratories</a>                           | Consultant | Self                                                                     |
| <i>Category:</i> Consultant<br><i>Additional Information:</i> |            | <i>Description:</i> provide advice on new assay formulations and changes |

## Additional Questions:

- Are there other relationships or activities that readers could perceive to have influenced, or that give the appearance of potentially influencing, what you wrote in the submitted work?**  
No.
- What is the manuscript title?**  
A Randomized Trial of Third Dose mRNA-1273 Vaccine in Transplant Recipients
- Are you the corresponding author?**  
No.

## Certification

I certify that the information provided in this disclosure is complete and accurate.

Disclosure Purpose: 21-11462

## Summary of Interests

### Company or Organization

| Entity                                                                                                                                                                                   | Type             | Interest Held By                                                                                                         |
|------------------------------------------------------------------------------------------------------------------------------------------------------------------------------------------|------------------|--------------------------------------------------------------------------------------------------------------------------|
| <a href="#">F. Hoffmann-La Roche</a>                                                                                                                                                     | Grant / Contract | Self                                                                                                                     |
| <i>Recipient Name:</i> University Health Network<br><i>Grant / Contract Description:</i> Baloxavir vs. Placebo for Treatment of Hospitalized Patients with Influenza                     |                  | <i>Recipient Type:</i> Institution<br><i>Grant / Contract Purpose:</i> Research<br><i>Additional Information:</i>        |
| <a href="#">F. Hoffmann-La Roche</a>                                                                                                                                                     | Consultant       | Self                                                                                                                     |
| <i>Category:</i> Consultant<br><i>Additional Information:</i>                                                                                                                            |                  | <i>Description:</i> Advisory Fees: Baloxavir in Influenza Infections Use of monoclonal antibody preparations in COVID-19 |
| <a href="#">GlaxoSmithKline</a>                                                                                                                                                          | Grant / Contract | Self                                                                                                                     |
| <i>Recipient Name:</i> University Health Network<br><i>Grant / Contract Description:</i> Shingrix Vaccine in Kidney Transplant Recipients Booster Dose of Shingrix Vaccine in Transplant |                  | <i>Recipient Type:</i> Institution<br><i>Grant / Contract Purpose:</i> Research<br><i>Additional Information:</i>        |
| <a href="#">GlaxoSmithKline</a>                                                                                                                                                          | Consultant       | Self                                                                                                                     |
| <i>Category:</i> Consultant<br><i>Additional Information:</i>                                                                                                                            |                  | <i>Description:</i> Advisory Fees for Shingrix Vaccine in Immunocompromised Populations                                  |
| <a href="#">Merck</a>                                                                                                                                                                    | Consultant       | Self                                                                                                                     |
| <i>Category:</i> Consultant<br><i>Additional Information:</i>                                                                                                                            |                  | <i>Description:</i> Consultancy and Advisory Board                                                                       |
| <a href="#">Pfizer</a>                                                                                                                                                                   | Other            | Self                                                                                                                     |
| <i>Category:</i> Other<br><i>Additional Information:</i>                                                                                                                                 |                  | <i>Description:</i> Advisory Board - Pneumococcal Conjugate Vaccine                                                      |
| <a href="#">SANOFI PASTEUR INC.</a>                                                                                                                                                      | Consultant       | Self                                                                                                                     |
| <i>Category:</i> Consultant<br><i>Additional Information:</i>                                                                                                                            |                  | <i>Description:</i> Advisory Fees: Influenza Vaccine Advisory Board                                                      |

### Additional Questions:

- Are there other relationships or activities that readers could perceive to have influenced, or that give the appearance of potentially influencing, what you wrote in the submitted work?**  
 No.
- What is the manuscript title?**  
 A Randomized Trial of Third Dose mRNA-1273 Vaccine in Transplant Recipients
- Are you the corresponding author?**  
 No.

### Certification

I certify that the information provided in this disclosure is complete and accurate.



**Disclosure Purpose:** 21-11462

### Summary of Interests

I do not have any interests to disclose at this time.

### Additional Questions:

- Are there other relationships or activities that readers could perceive to have influenced, or that give the appearance of potentially influencing, what you wrote in the submitted work?**  
No.
- What is the manuscript title?**  
"A Randomized Trial of Third Dose mRNA-1273 Vaccine in Transplant Recipients,"
- Are you the corresponding author?**  
No.

### Certification

I certify that the information provided in this disclosure is complete and accurate.

**Disclosure Purpose:** 21-11462

### Summary of Interests

I do not have any interests to disclose at this time.

### Additional Questions:

- Are there other relationships or activities that readers could perceive to have influenced, or that give the appearance of potentially influencing, what you wrote in the submitted work?**  
No.
- What is the manuscript title?**  
A randomized trial of third dose mRNA-1273 vaccine in transplant recipients
- Are you the corresponding author?**  
No.

### Certification

I certify that the information provided in this disclosure is complete and accurate.

**Disclosure Purpose:** 21-11462

## Summary of Interests

| Company or Organization                                       |            |                                                                                                 |
|---------------------------------------------------------------|------------|-------------------------------------------------------------------------------------------------|
| Entity                                                        | Type       | Interest Held By                                                                                |
| <a href="#">Novartis</a>                                      | Consultant | Self                                                                                            |
| <i>Category:</i> Consultant<br><i>Additional Information:</i> |            | <i>Description:</i> 2 hour round table discussion of an immunosuppressive agent in development. |

## Additional Questions:

- Are there other relationships or activities that readers could perceive to have influenced, or that give the appearance of potentially influencing, what you wrote in the submitted work?**  
No.
- What is the manuscript title?**  
A Randomized Trial of Third Dose mRNA-1273 Vaccine in Transplant Recipients
- Are you the corresponding author?**  
No.

## Certification

I certify that the information provided in this disclosure is complete and accurate.

**Disclosure Purpose:** 21-11462

### Summary of Interests

I do not have any interests to disclose at this time.

### Additional Questions:

- Are there other relationships or activities that readers could perceive to have influenced, or that give the appearance of potentially influencing, what you wrote in the submitted work?**  
No.
- What is the manuscript title?**  
A Randomized Trial of Third Dose mRNA-1273 Vaccine in Transplant Recipients
- Are you the corresponding author?**  
No.

### Certification

I certify that the information provided in this disclosure is complete and accurate.

**Disclosure Purpose:** 21-11462

Summary of Interests

I do not have any interests to disclose at this time.

Additional Questions:

- 1. **Are there other relationships or activities that readers could perceive to have influenced, or that give the appearance of potentially influencing, what you wrote in the submitted work?**  
No.
- 2. **What is the manuscript title?**  
A Randomized Trial of Third Dose mRNA-1273 Vaccine in Transplant Recipients
- 3. **Are you the corresponding author?**  
No.

Certification

I certify that the information provided in this disclosure is complete and accurate.



Supplement: NEJMc2111462_disclosures.pdf [file NEJMc2111462_disclosures.pdf]
