# Supplementary material
Source: PubMed Central journal article supplement (PMC8385563)
Supplement: NEJMc2111462_data-sharing.pdf [file NEJMc2111462_data-sharing.pdf]

## Data Sharing Statement

Hall VG, Ferreira VH, Ku T, et al. Randomized Trial of a Third Dose of mRNA-1273 Vaccine in Transplant Recipients. N Engl J Med. DOI: 10.1056/NEJMc2111462.

| Question                                                            | Authors' Response                                                                                                                     |
|---------------------------------------------------------------------|---------------------------------------------------------------------------------------------------------------------------------------|
| Will the data collected for your study be made available to others? | Yes                                                                                                                                   |
| Would you like to offer context for your decision?                  | —                                                                                                                                     |
| Which data?                                                         | Individual participant data related to the primary endpoint that underlie the results reported in this article after deidentification |
| Additional information about data                                   | —                                                                                                                                     |
| How or where can the data be obtained?                              | Data can be obtained by contacting the investigators at <a href="mailto:Deepali.kumar@uhn.ca">Deepali.kumar@uhn.ca</a>                |
| When will data availability begin?                                  | Immediately after publication                                                                                                         |
| When will data availability end?                                    | 5 years after publication                                                                                                             |
| Will any supporting documents be available?                         | Yes                                                                                                                                   |
| Which supporting documents?                                         | Protocol and Statistical Analysis Plan                                                                                                |
| Additional information about supporting documents                   | —                                                                                                                                     |
| How or where can supporting documents be obtained?                  | Available online with the article                                                                                                     |
| When will supporting documents availability begin?                  | Immediately after publication                                                                                                         |
| When will supporting documents availability end?                    | —                                                                                                                                     |
| To whom will data be available?                                     | Researchers who provide a methodologically sound proposal that aligns with the purpose of the study. Regulatory agencies.             |
| For what type of analysis or purpose?                               | —                                                                                                                                     |
| By what mechanism?                                                  | Proposals should be directed to <a href="mailto:Deepali.kumar@uhn.ca">Deepali.kumar@uhn.ca</a>                                        |
| Any other restrictions?                                             | Data requestors will need to sign a data access agreement.                                                                            |
| Additional information                                              | —                                                                                                                                     |

This statement was posted on August 11, 2021, at NEJM.org.
